# Supplementary material for: Comprehensive pathway-related genes signature for prognosis and recurrence of ovarian cancer
Source: PeerJ journal article supplement (doi:10.7717/peerj.10437), 2020-12-01

## GO analysis

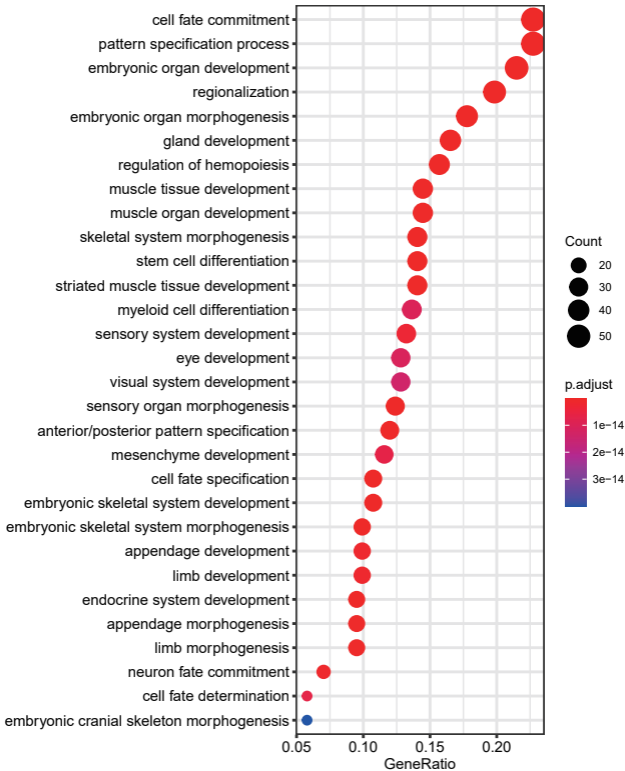

Supplement: Supplementary_Figure_S4.pdf [file Supplementary_Figure_S4.pdf]
